# Supplementary material for: 2D self-catenated coordination polymer constructed by triple- and double-helical chains
Source: Royal Society of Chemistry journal article supplement (doi:10.1039/c001249c), 2010-01-01
Supplement: c001249c.pdf [file c001249c.pdf]

## Supporting materials

### 2D self-catenated coordination polymer constructed by triple- and double-helical chains

Jian-Ke Sun, Qing-Xia Yao, Zhan-Feng Ju and Jie Zhang\*

*State Key Laboratory of Structural Chemistry, Fujian Institute of Research on the Structure of Matter and Graduate School of the Chinese Academy of Sciences, Fuzhou, Fujian 350002( China)*

---

---

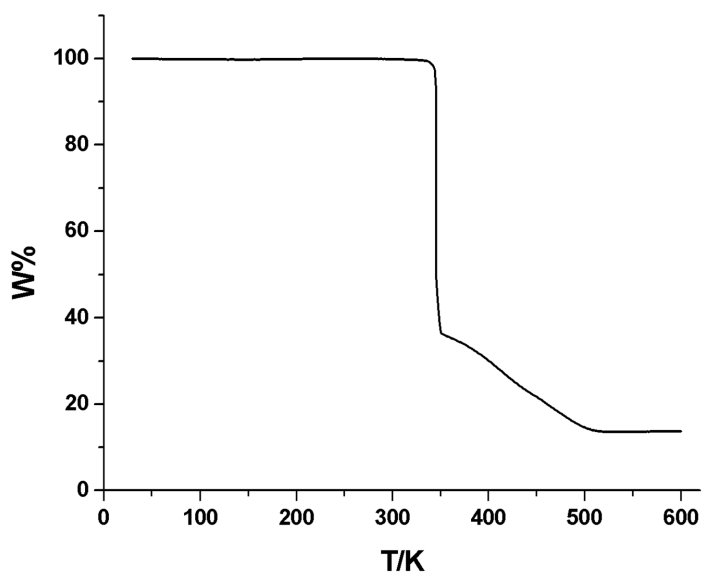

Fig. S1. TG plot of compound 1.

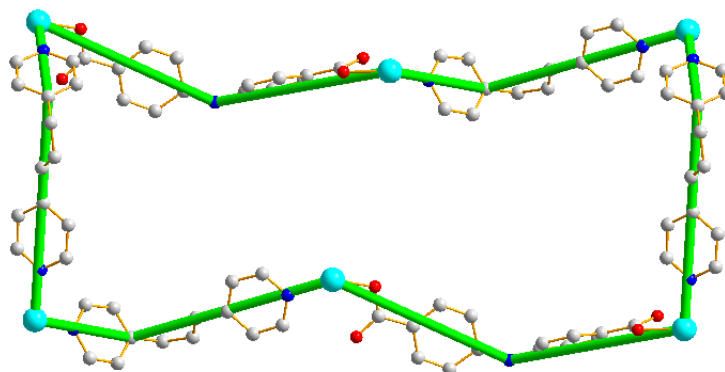

Fig. S2. Six-membered circuit is constructed by four bpp ligands and two cpdba<sup>2-</sup> ligands.

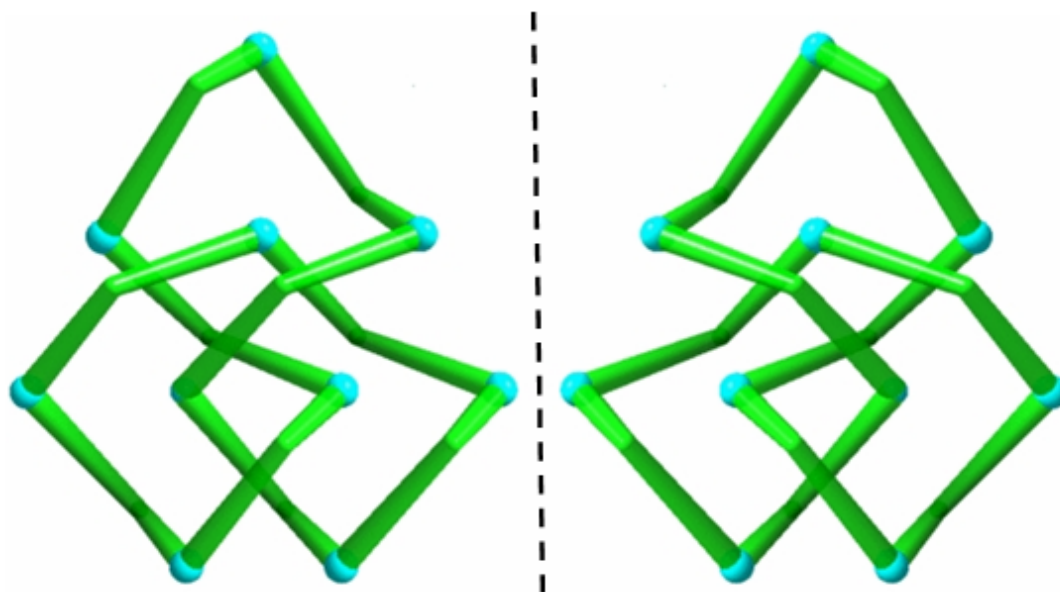

Fig.S3. Two enantiomers of trefoil-type molecular knots observed in the different layers of 1.

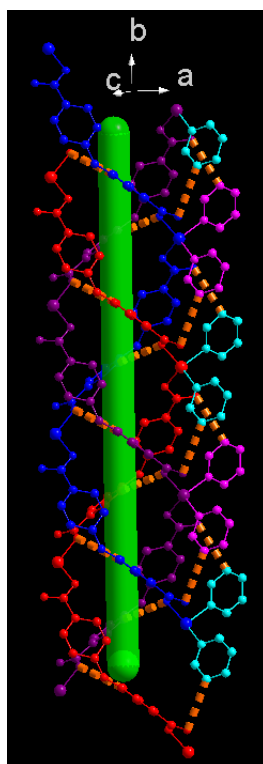

Fig.S4. The C–H···O hydrogen bonds (dashed lines) between the cpdba<sup>2-</sup> ligands in triple helix exist in a spiral arrangement running along the [0 1 0] direction. The nitro groups of cpdba<sup>2-</sup> ligands are omitted for clarity.

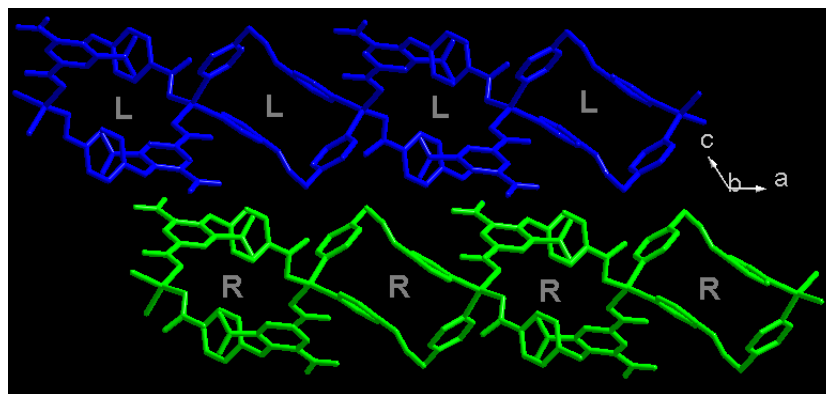

Fig.S5. The abutting layers are related by inversion centre and show an opposite chirality.

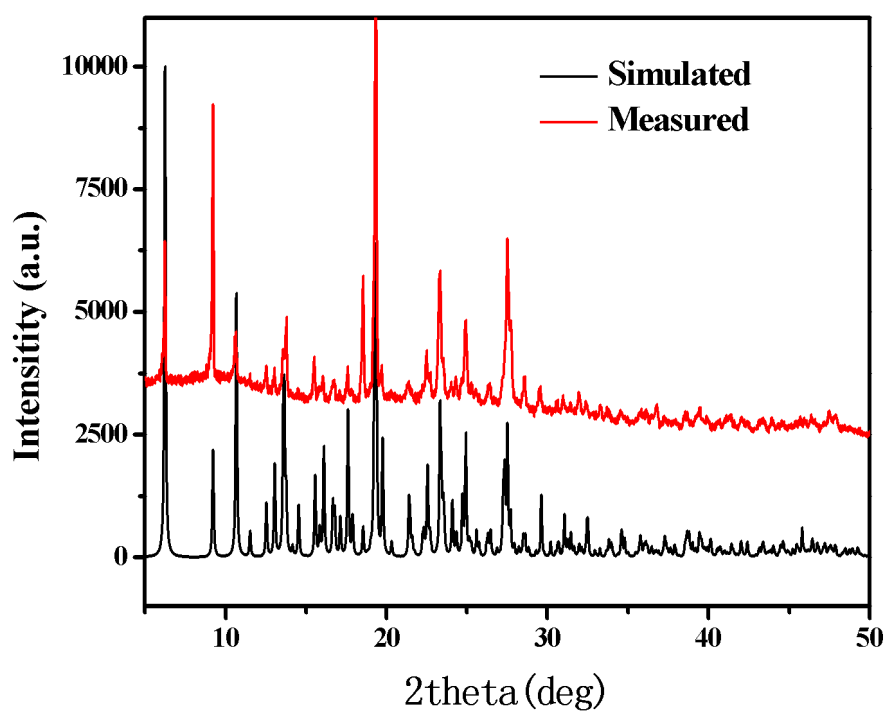

Fig. S6. Experimental and simulated powder X-ray diffraction patterns of compounds **1**
